# Supplementary material
Source: PubMed Central journal article supplement (PMC3569992)

**Clone A**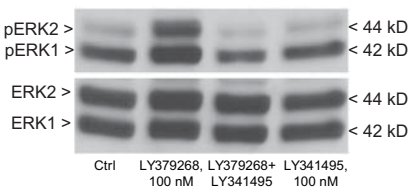**Clone A**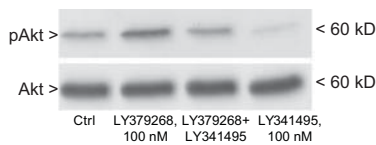**Clone B**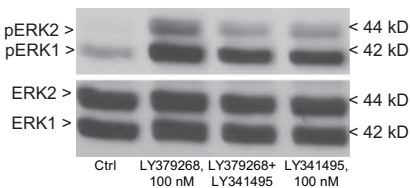**Clone D**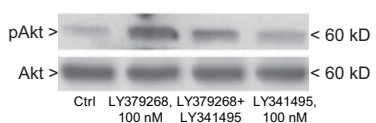**Clone D**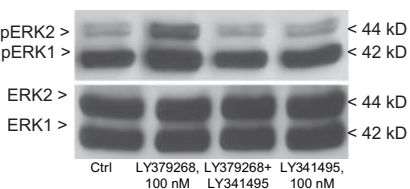

Supplement: cdd2012150x1.pdf [file cdd2012150x1.pdf]

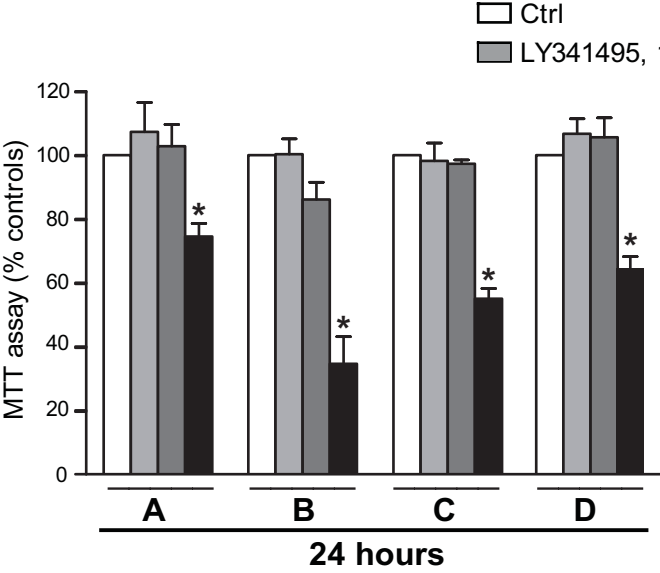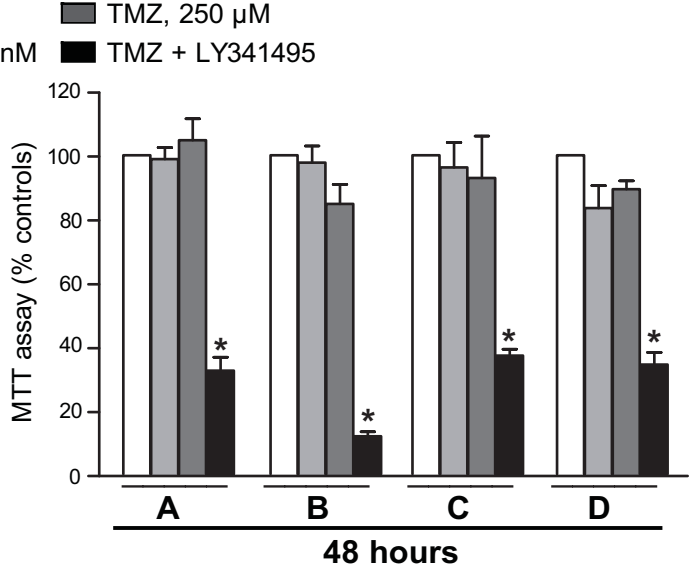

Supplement: cdd2012150x2.pdf [file cdd2012150x2.pdf]

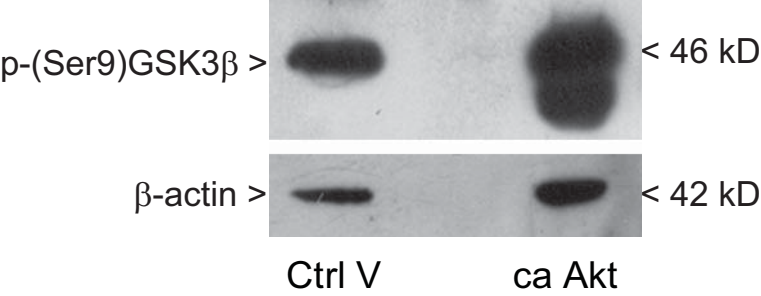

**SUPPLEMENTARY FIGURE 3**

Supplement: cdd2012150x3.pdf [file cdd2012150x3.pdf]

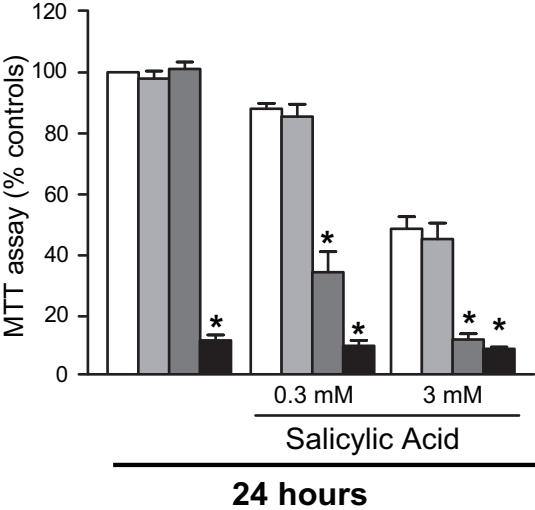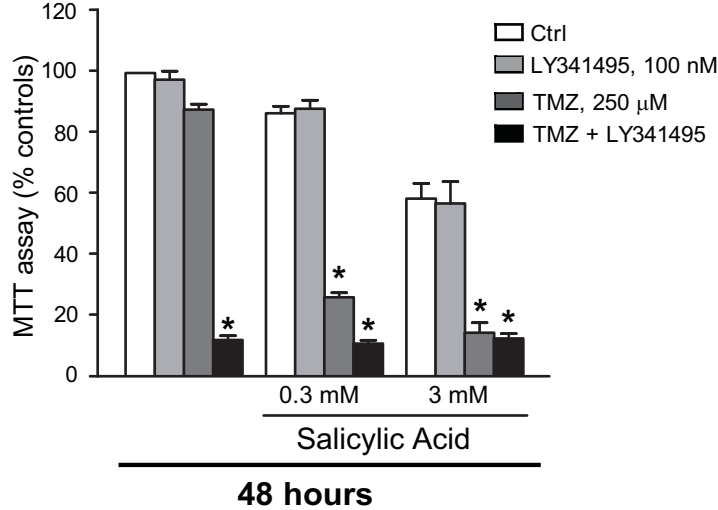

SUPPLEMENTARY FIGURE 4

Supplement: cdd2012150x4.pdf [file cdd2012150x4.pdf]

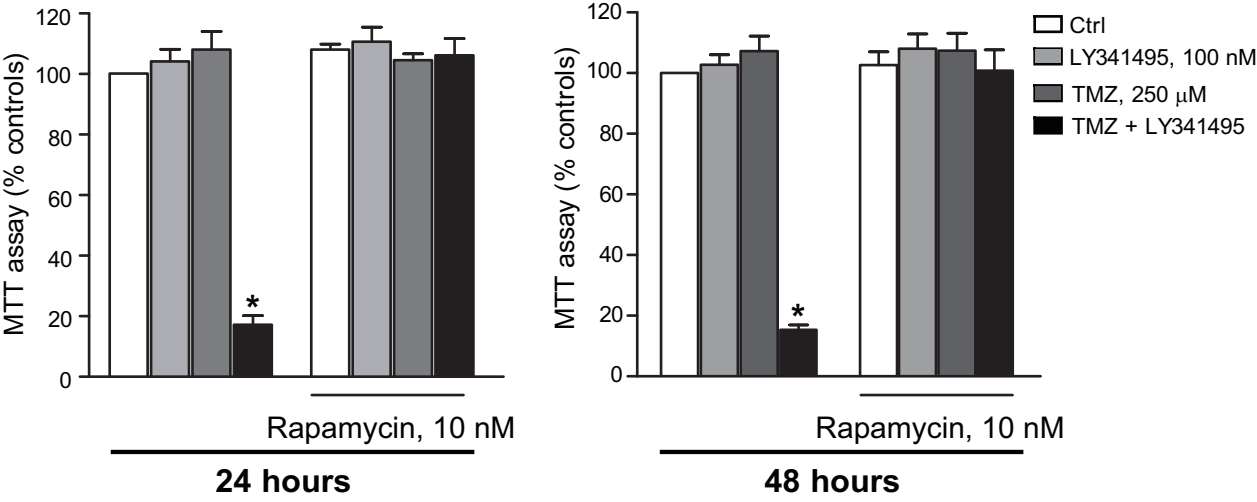

SUPPLEMENTARY FIGURE 5

Supplement: cdd2012150x5.pdf [file cdd2012150x5.pdf]

## CLONE A

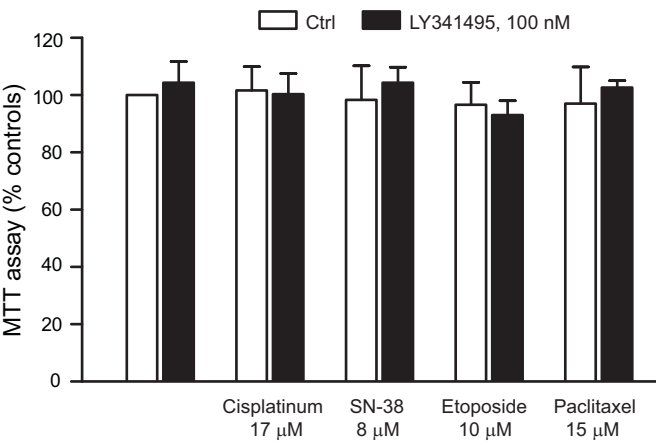

## CLONE D

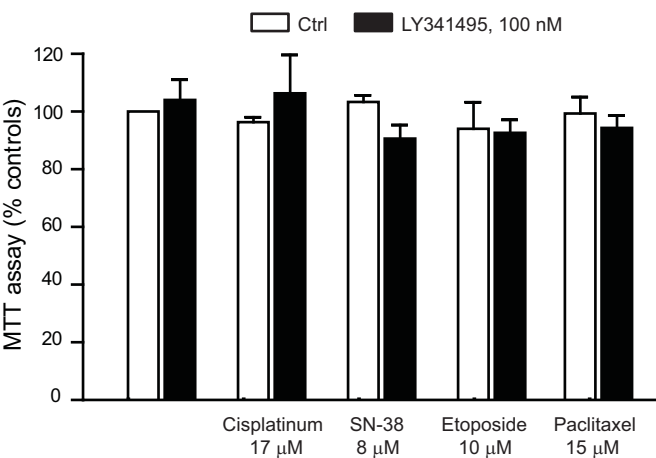

Supplement: cdd2012150x6.pdf [file cdd2012150x6.pdf]

**Clone A**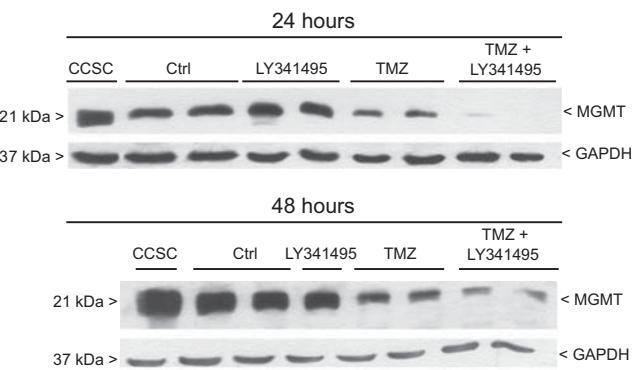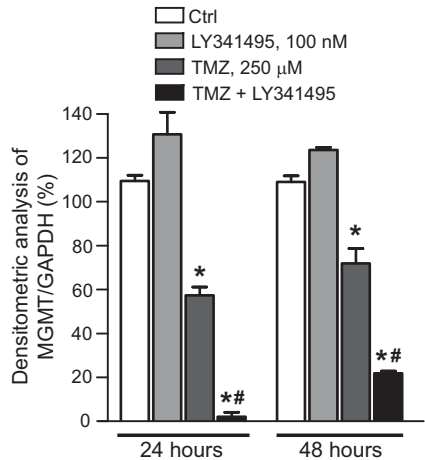**Clone B**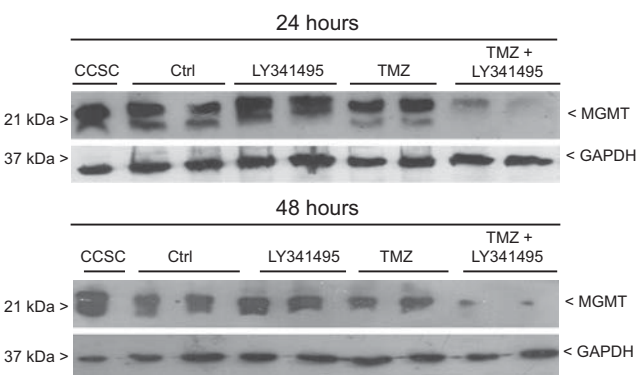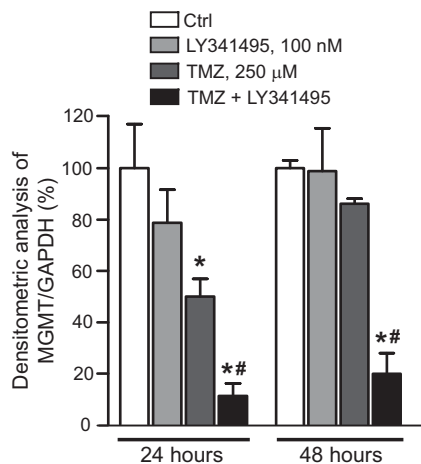**Clone D**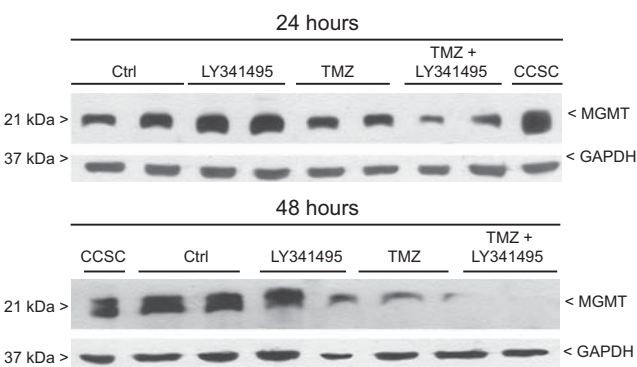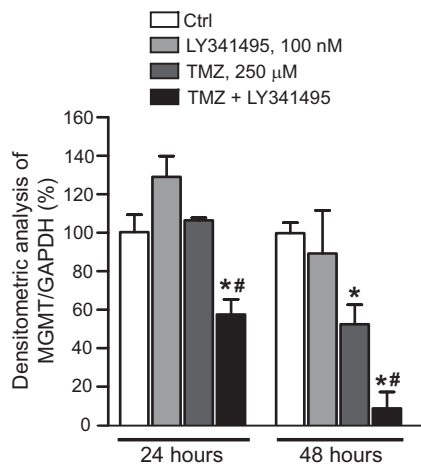

Supplement: cdd2012150x7.pdf [file cdd2012150x7.pdf]

Representative slides from individual mice  
(2 month treatment)

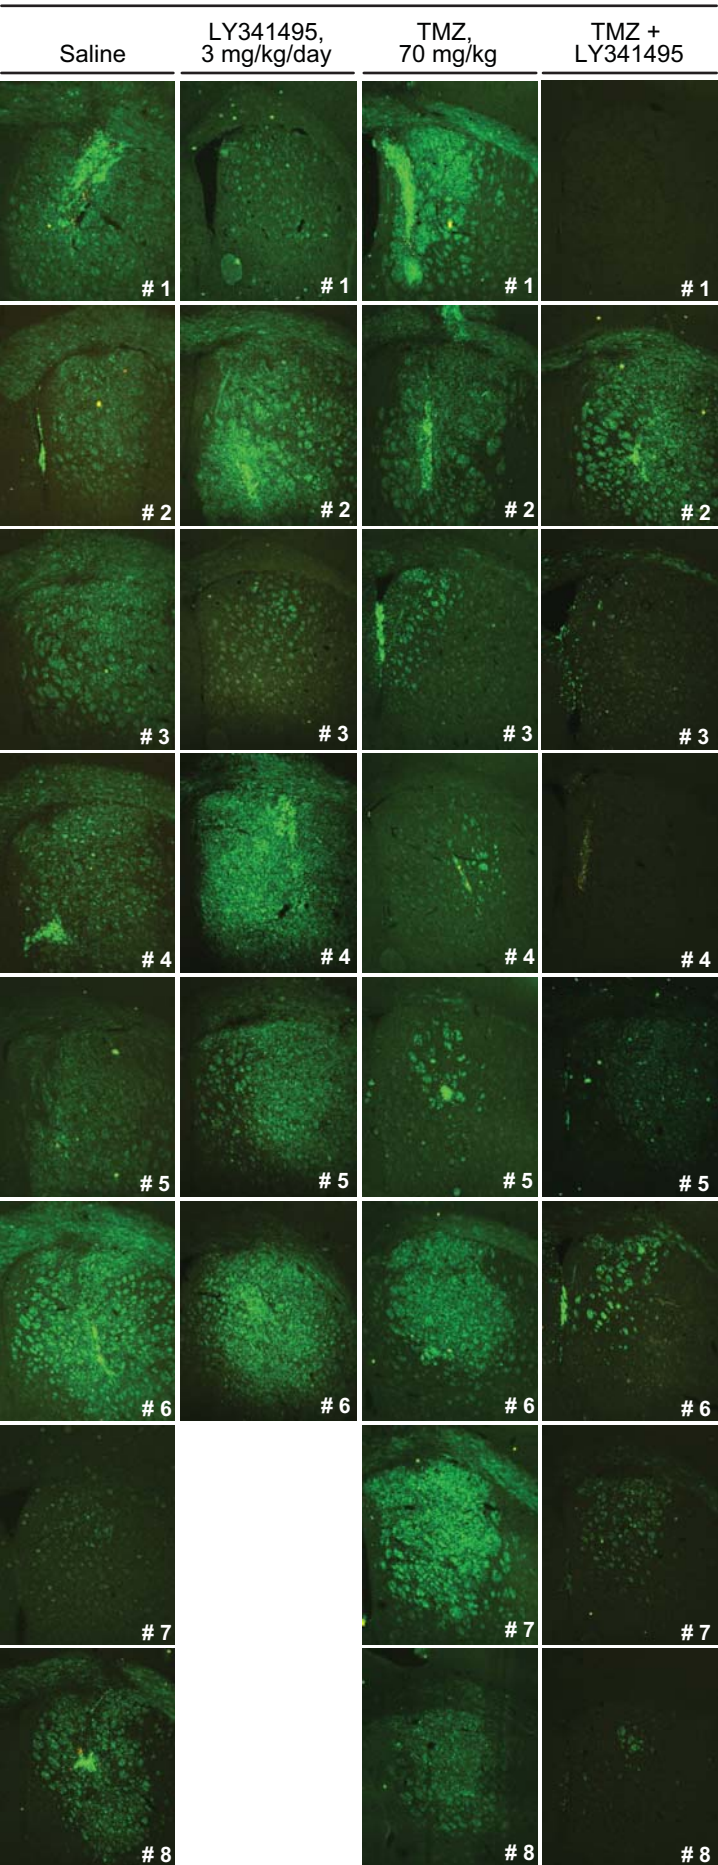

SUPPLEMENTARY FIGURE 8

Supplement: cdd2012150x8.pdf [file cdd2012150x8.pdf]
